# Supplementary material
Source: publisher figshare collection journal article supplement (https://acs.figshare.com/ndownloader/files/5119801)
Supplement: Supplementary file 1 [file 5119801]

# Photocatalytic Water Splitting with the Cr-doped $\text{Ba}_2\text{In}_2\text{O}_5/\text{In}_2\text{O}_3$ Composite Oxide Semiconductors

Defa Wang,<sup>†</sup> Zhigang Zou,<sup>‡</sup> Jinhua Ye<sup>\*,†,§</sup>

*Precursory Research for Embryonic Science and Technology (PREST), Japan Science and  
Technology Agency (JST), 4-1-8 Hon-cho Kawaguchi-shi, Saitama 332-0012, Japan*

*Ecomaterials and Renewable Energy Research Center (ERERC), Nanjing University, 22 Hankou  
Road, Nanjing 210093, China*

*Ecomaterials Center, National Institute for Materials Science (NIMS), 1-2-1 Sengen, Tsukuba,  
Ibaraki 305-0047, Japan*

(1) HRTEM micrographs of the composite C-BIO ( $\text{Cr-Ba}_2\text{In}_2\text{O}_5/\text{Cr-In}_2\text{O}_3$ ) powder samples

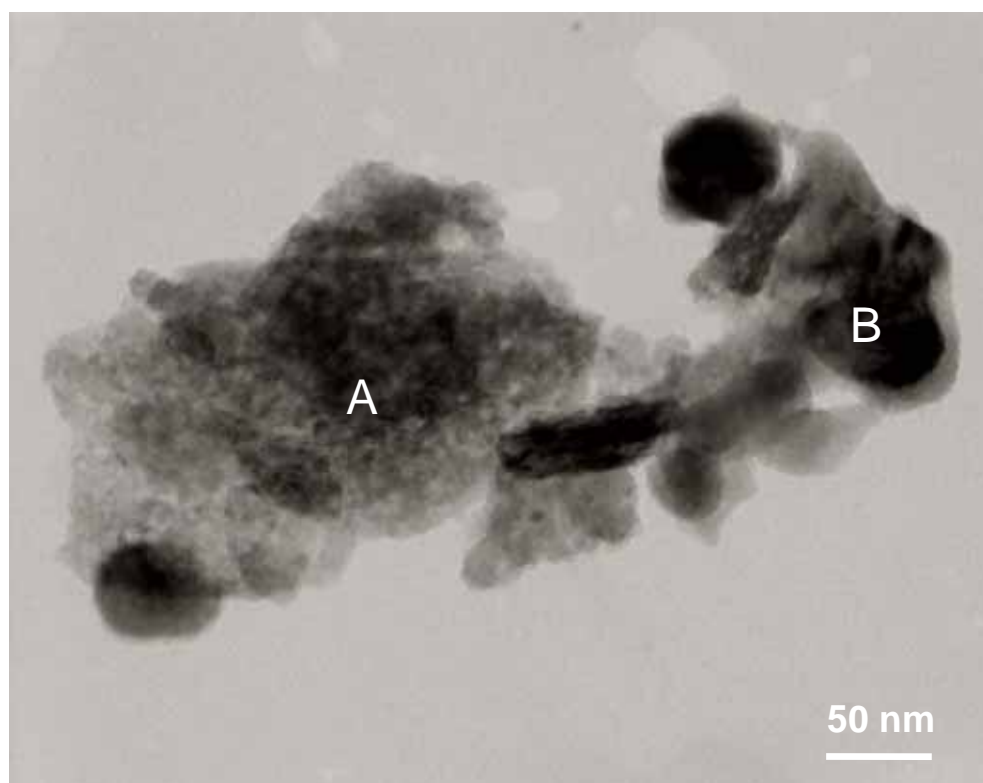

**Figure S1.** A typical TEM image of C-BIO powder sample comprised of a nano-scaled area (A) and a micro-scaled area (B), depending on the different sizes of raw materials.

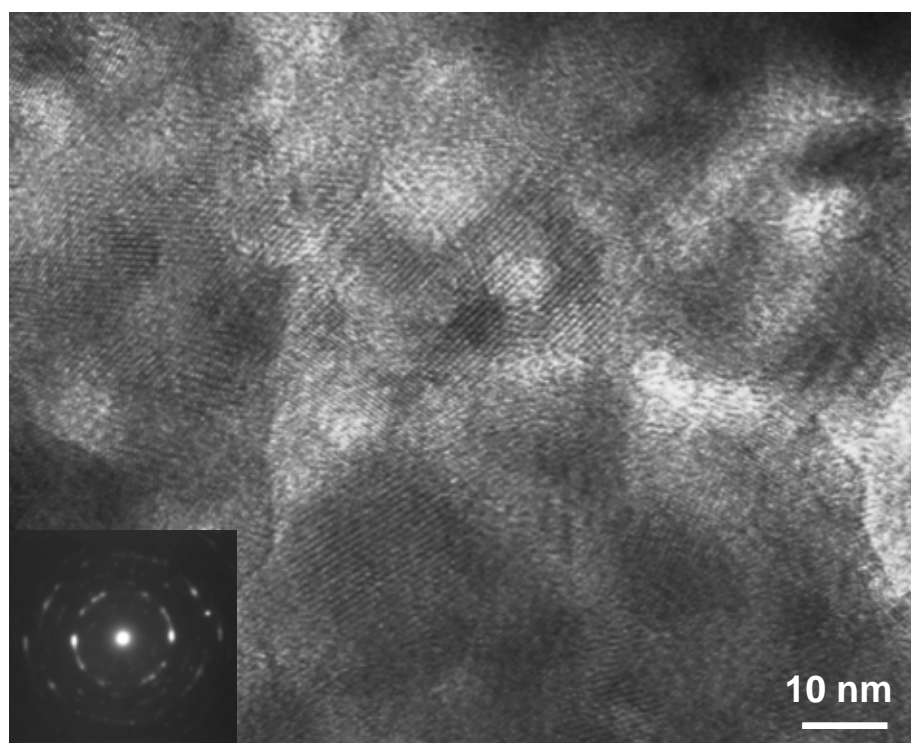

**Figure S2.** HRTEM micrograph and corresponding SAED pattern of the nanocomposite C-BIO in a nano-scaled area. The indexed result indicated that this area of C-BIO is composed of different phases ( $\text{Cr-Ba}_2\text{In}_2\text{O}_5$  and  $\text{Cr-In}_2\text{O}_3$ ) with different crystal orientations, among which an ohmic contact might be formed.

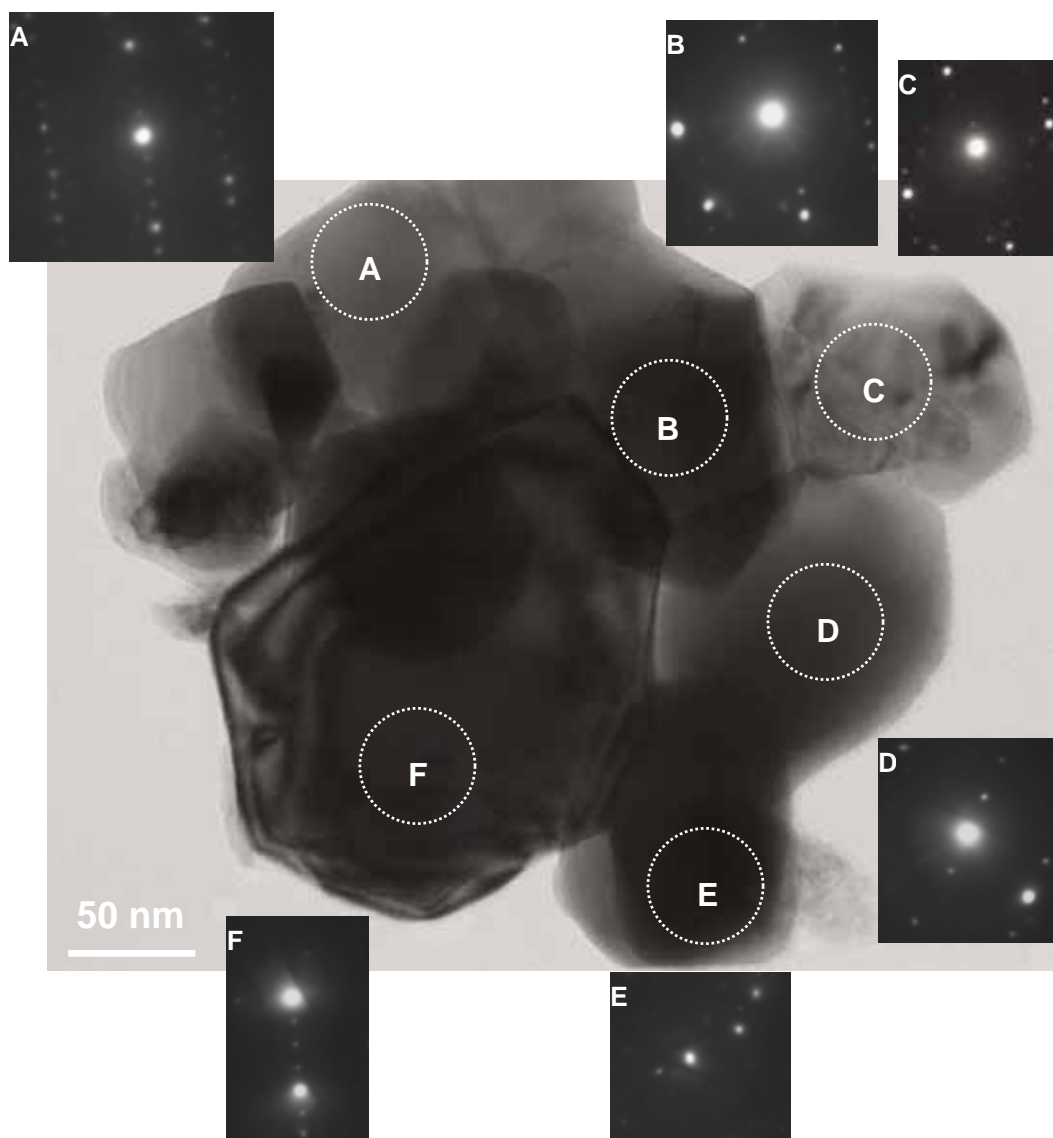

**Figure S3.** TEM micrograph and corresponding SAED patterns in a micro-scaled area of C-BIO, showing different phases and crystal orientations.

(2) Theoretically calculated band structures and total density of states (DOS) of  $\text{In}_2\text{O}_3$  and  $\text{Ba}_2\text{In}_2\text{O}_5$

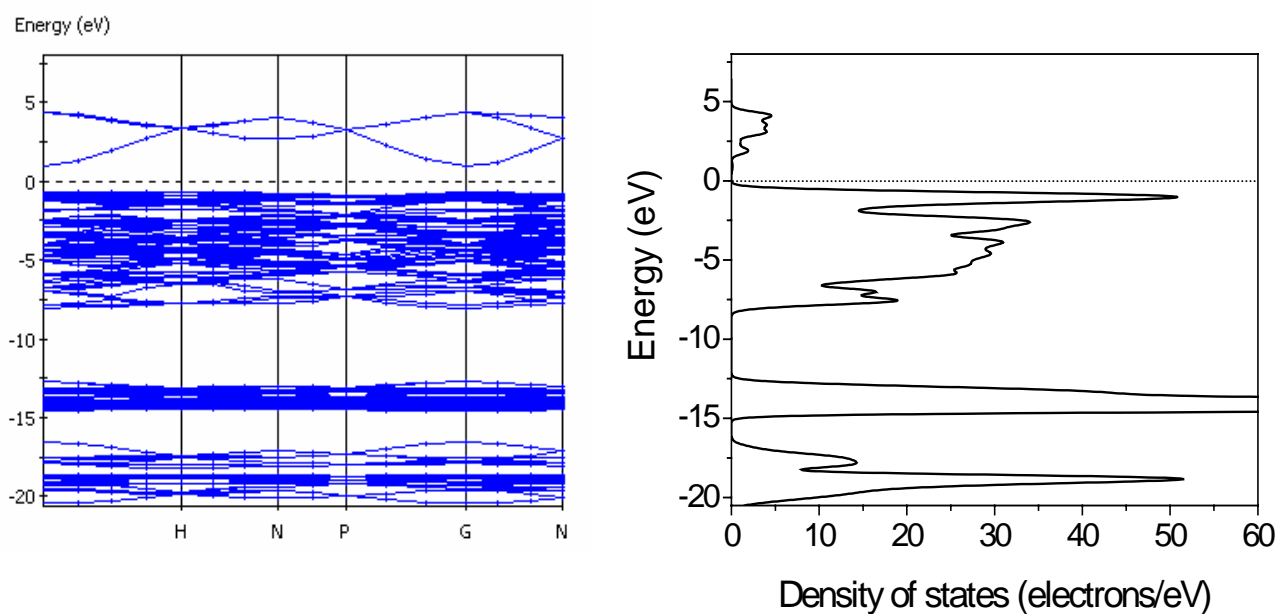

**Figure S4.** Band structure and total density of states (DOS) of  $\text{In}_2\text{O}_3$

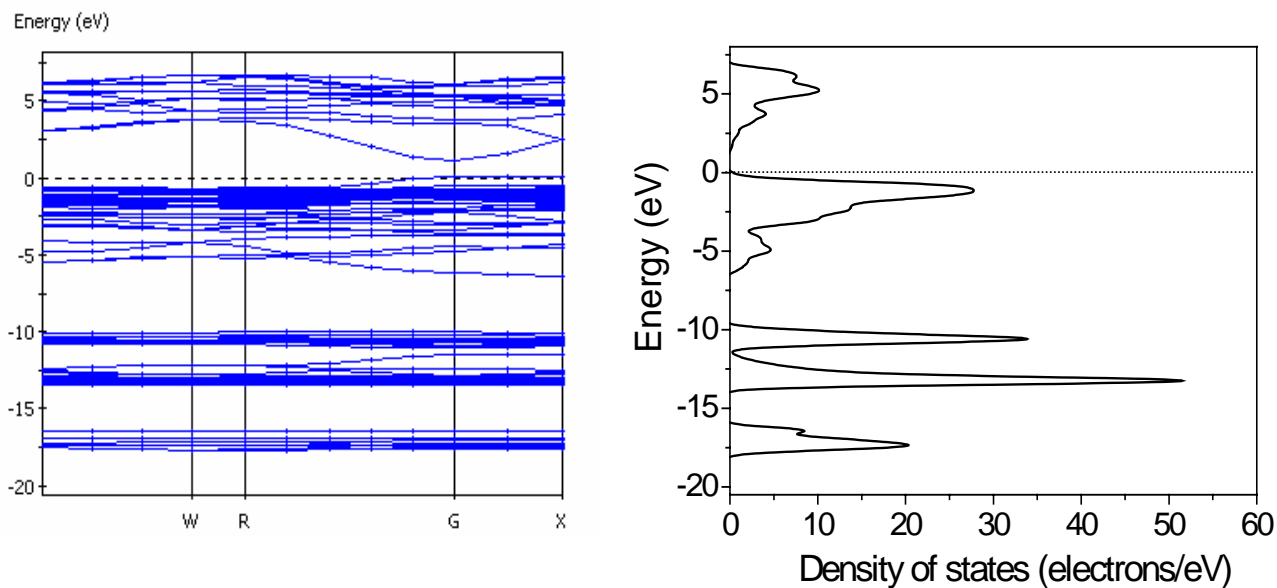

**Figure S5.** Band structure and total density of states (DOS) of  $\text{Ba}_2\text{In}_2\text{O}_5$
